# Supplementary material for: 5-Arylpyrimido-[4,5-b]quinoline-diones as new and sustainable corrosion inhibitors for mild steel in 1 M HCl: a combined experimental and theoretical approach
Source: Royal Society of Chemistry journal article supplement (doi:10.1039/c5ra27417f), 2016-01-01

## Electronic Supplementary Material (ESI) for RSC Advances

### <sup>1</sup>H NMR spectrum of APQD-1:

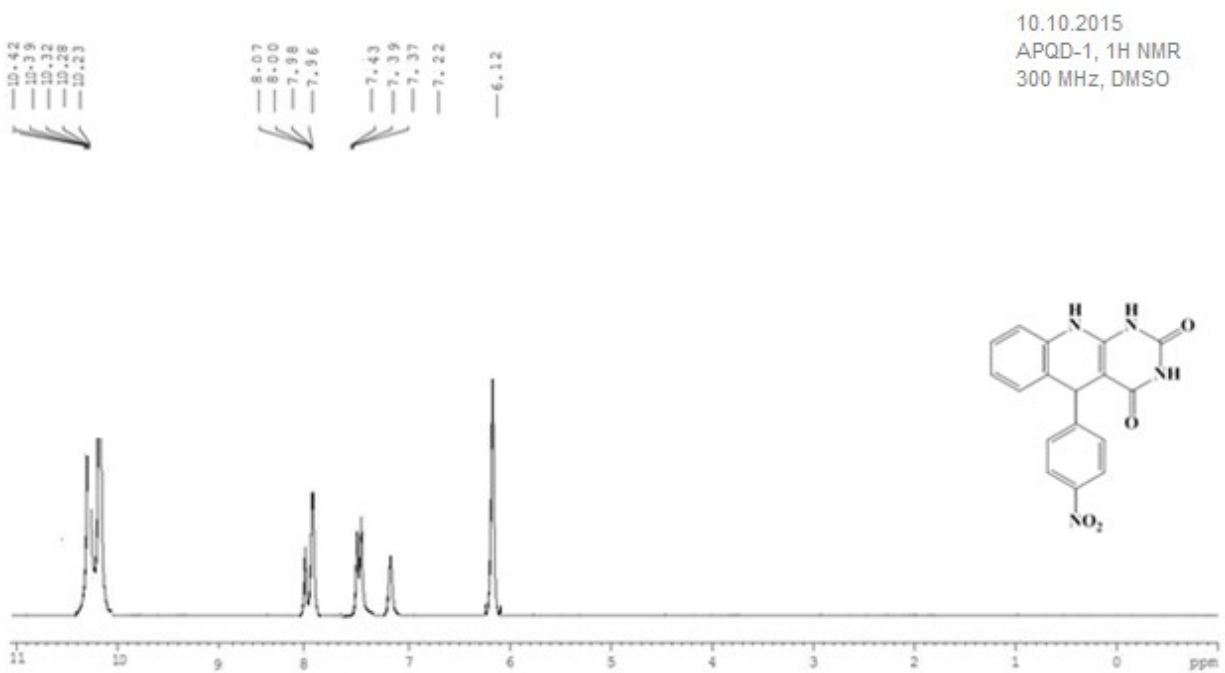

# **<sup>1</sup>H NMR spectrum of APQD-2:**

10.92  
10.90  
10.86  
10.83

9.45

8.09

7.54

7.23

7.16

7.11

6.96

6.21

6.12

5.96

10.10.2015  
APQD-2, <sup>1</sup>H NMR  
300 MHz, DMSO

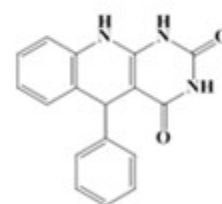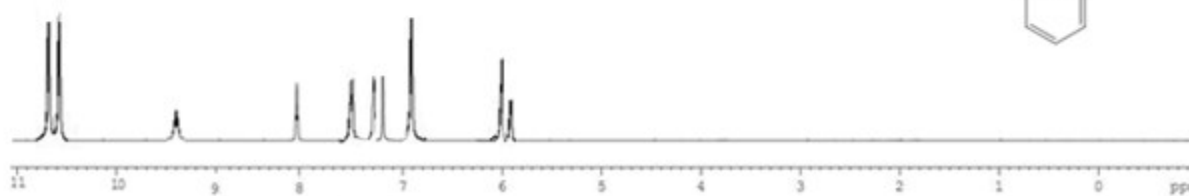

# **<sup>1</sup>H NMR spectrum of APQD-3:**

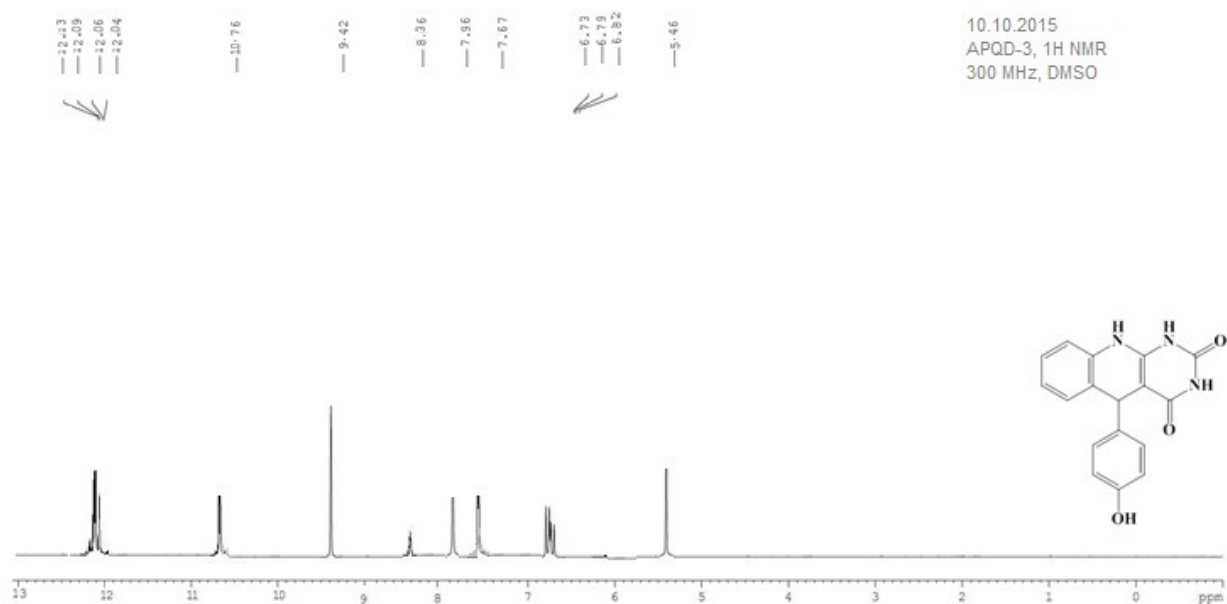

# **<sup>1</sup>H NMR spectrum of APQD-4:**

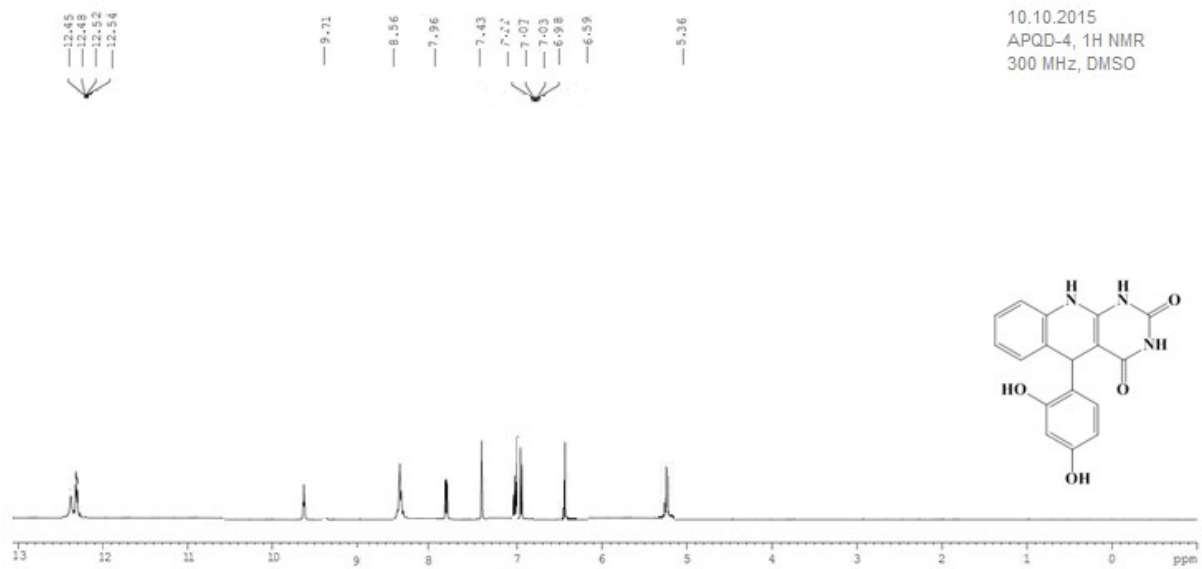

Supplement: c5ra27417f1.pdf [file c5ra27417f1.pdf]
